# Supplementary material for: Energy level modulation of TiO2 using amino trimethylene phosphonic acid for efficient perovskite solar cells with an average VOC of 1.19 V
Source: Royal Society of Chemistry journal article supplement (doi:10.1039/d2se01522f), 2022-12-17
Supplement: d2se01522f1.pdf [file d2se01522f1.pdf]

## Supporting Information

### **Energy Level Modulation of TiO<sub>2</sub> Using Amino Trimethylene Phosphonic Acid for Efficient Perovskite Solar Cells with Average $V_{OC}$ of 1.19 V**

*Xiaopeng Yue<sup>1,2</sup>, Bingbing Fan<sup>1</sup>, Xing Zhao<sup>1</sup>, Yingying Yang<sup>1</sup>, Shujie Qu<sup>1</sup>, Qiang Zhang<sup>1</sup>, Xin Sun<sup>1</sup>, Peng Cui<sup>1</sup>, Junfeng Ma<sup>1</sup>, Meicheng Li<sup>1\*</sup>*

<sup>1</sup>State Key Laboratory of Alternate Electrical Power System with Renewable Energy Sources, School of New Energy, North China Electric Power University, Beijing 102206, China

<sup>2</sup>School of Energy and Environmental Engineering, Hebei University of Engineering, Handan, Hebei 056038, China

\*Corresponding authors:

E-mails: [mcli@ncepu.edu.cn](mailto:mcli@ncepu.edu.cn) (*Meicheng Li*)

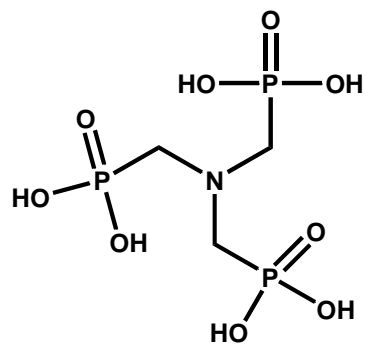

**Figure S1.** Chemical structure of ATMP.

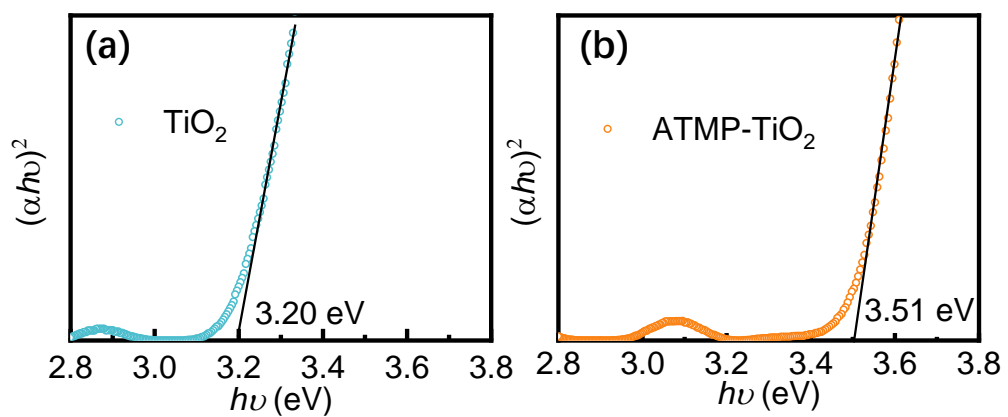

**Figure S2.** Tauc plots for (a)  $\text{TiO}_2$  and (b) ATMP- $\text{TiO}_2$  films.

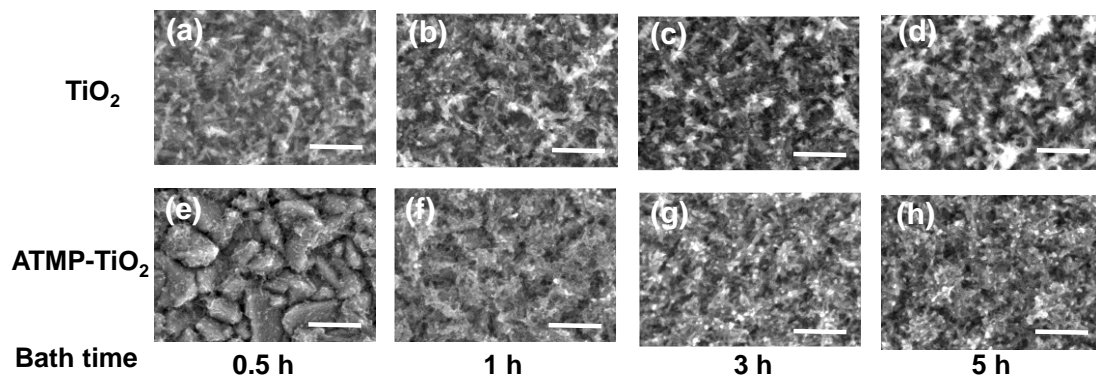

**Figure S3.** SEM images of  $\text{TiO}_2$  films (a-d) and  $\text{ATMP-TiO}_2$  films (e-h) with different chemical bath times. Scale bars represent 300 nm.

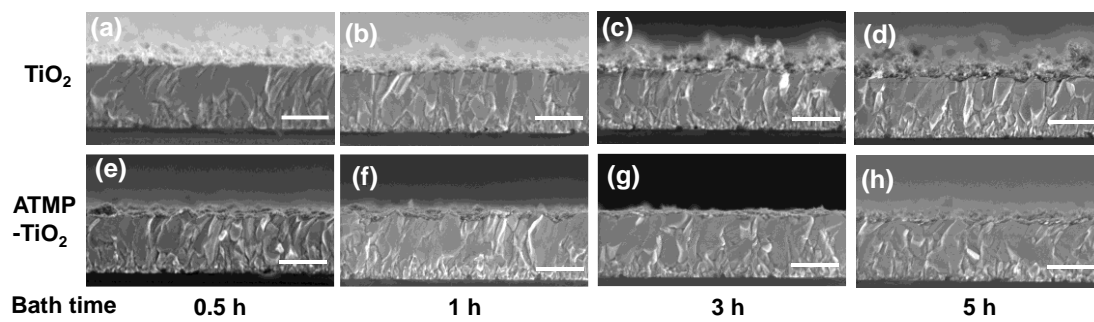

**Figure S4.** Cross-sectional SEM images of (a-d) TiO<sub>2</sub> and (e-h) ATMP-TiO<sub>2</sub> films with different chemical bath times. Scale bars represent 500 nm.

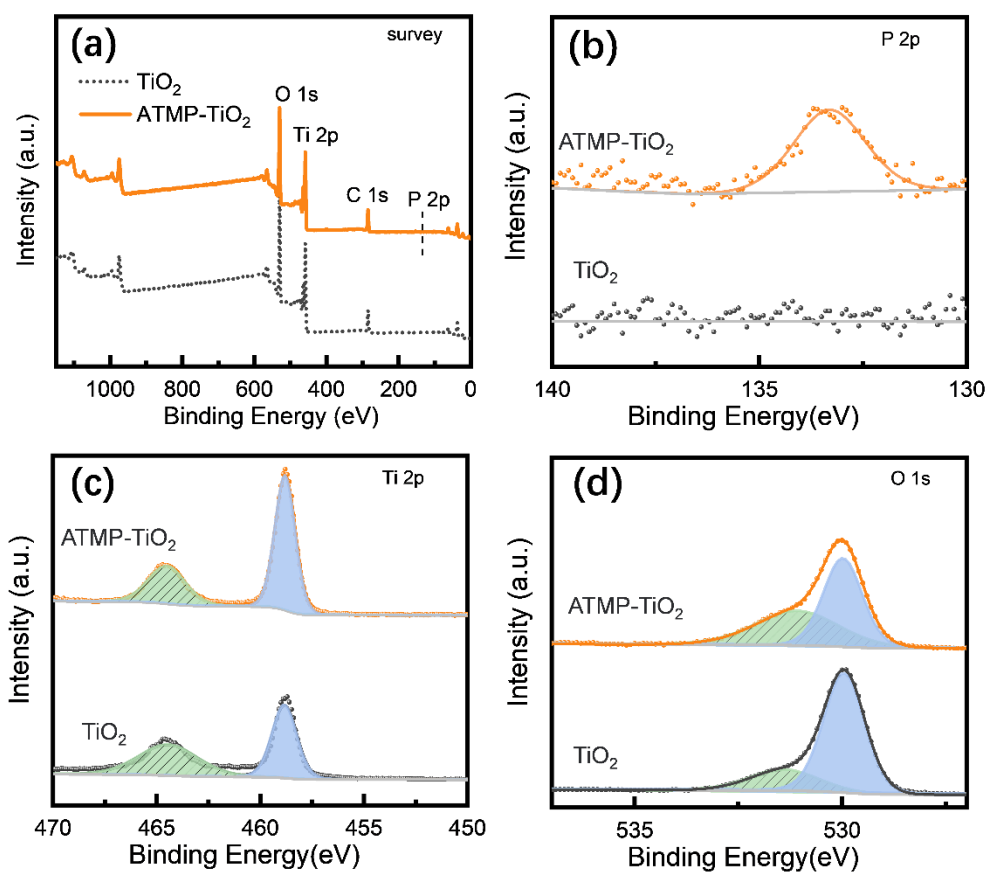

**Figure S5.** XPS spectra of  $\text{TiO}_2$  and ATMP- $\text{TiO}_2$  films. (a) Full survey spectra, (b) high-resolution P 2p spectra (c) high-resolution Ti 2p spectra and (d) high-resolution O 1s spectra.

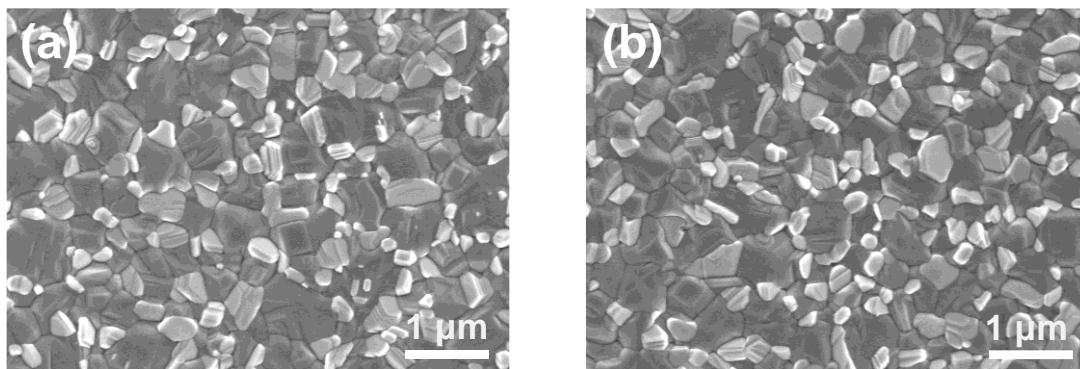

**Figure S6.** Top SEM images of perovskite films deposited on (a)  $\text{TiO}_2$  film and (b) ATMP- $\text{TiO}_2$  film.

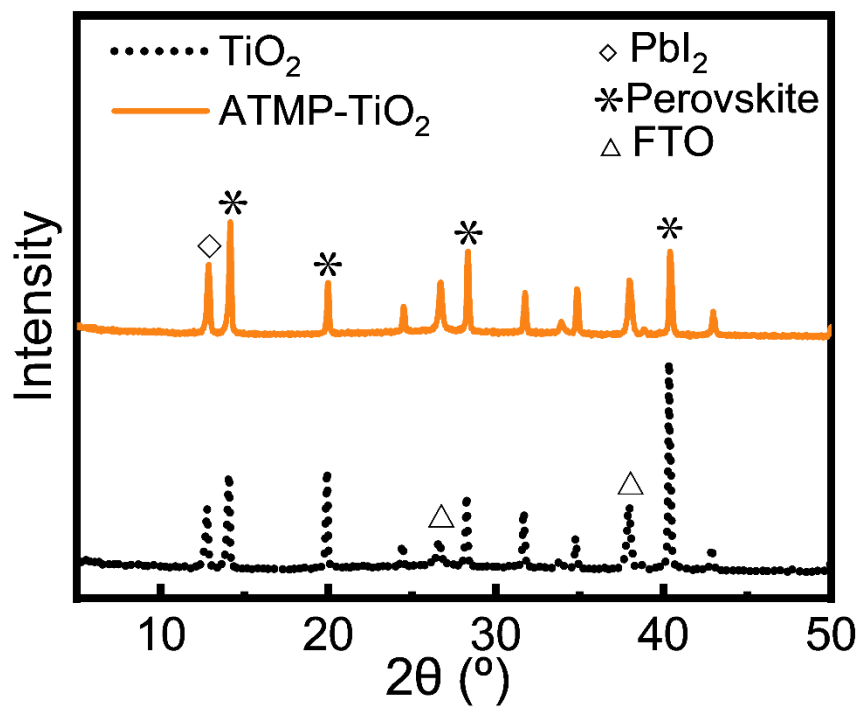

**Figure S7.** XRD patterns for perovskite films deposited on TiO<sub>2</sub> film and ATMP-TiO<sub>2</sub> film.



Table S1. TRPL parameters of PSCs based on TiO<sub>2</sub> and ATMP-TiO<sub>2</sub>.

| ETL                   | $\tau_1$<br>( $\mu\text{s}$ ) | $A_1$ | $\tau_2$<br>( $\mu\text{s}$ ) | $A_2$ | $\tau_{\text{Avg}}$<br>( $\mu\text{s}$ ) |
|-----------------------|-------------------------------|-------|-------------------------------|-------|------------------------------------------|
| TiO <sub>2</sub>      | 0.22                          | 0.29  | 1.06                          | 0.68  | 0.99                                     |
| ATMP-TiO <sub>2</sub> | 0.17                          | 0.31  | 1.51                          | 0.68  | 1.44                                     |

Table S2. EIS parameters of PSCs based on TiO<sub>2</sub> film and ATMP-TiO<sub>2</sub> film.

| ETL                   | R <sub>s</sub> (Ω) | CPE-T                 | CPE-P | R <sub>rec</sub> (Ω) |
|-----------------------|--------------------|-----------------------|-------|----------------------|
| TiO <sub>2</sub>      | 12.06              | 5.05×10 <sup>-8</sup> | 0.919 | 948                  |
| ATMP-TiO <sub>2</sub> | 9.94               | 3.01×10 <sup>-8</sup> | 0.943 | 3022                 |
